# Supplementary material for: Expression of Cowpea VuWRKY21 and VuWRKY87 Genes in Arabidopsis thaliana Confers Plant Tolerance to Salt Stress
Source: MDPI journal article supplement (doi:10.3390/dna3040014), 2023-11-08
Supplement: s1 [file s1]

## SUPPLEMENTARY MATERIAL

**Table S1.** List of primers used in *VuWRKY21* and 87 gene expression analysis in *Arabidopsis* transgenic lines and WT by qPCR.

| Primer                            | Sequence (5' – 3')                                          | Reference                     |
|-----------------------------------|-------------------------------------------------------------|-------------------------------|
| <i>AtP5CS1</i><br>(AT2G398000)    | (F) AGGGAAAGTTCCAGAAAG<br>(R) CATAACTAAGCGAGCCAC            | Zhu et al. (2018)             |
| <i>AtNXH1</i><br>(AT5G27150.1)    | (F) GACTCCTTCATGCGACCCG<br>(R) CACGTTACCCTCAAGCCTTAC        | Bao et al. (2018)             |
| <i>AtRD29A</i><br>(AT5g52310)     | (F) CAAAGCAATGAGCATGAGCAAG<br>(R) CGGAAGACACGACAGGAAACAC    | Ullah et al. (2018)           |
| <i>AtSOS1</i><br>(AT2G01980.1)    | (F) TCGGCAGCATGGTTAATGTG<br>(R) TTGGCTGAAACGAGACCTTGA       | Bao et al. (2018)             |
| <i>AtSOS2</i><br>(AT5G35410.1)    | (F) TTTGGTCTTGCGGGGTTATTC<br>(R) CGTGT TTTGGGATTGGGGTC      | Ullah et al. (2018)           |
| <i>AtSOS3</i><br>(AT5G24270.1)    | (F) AATCCATCGCTCATCAAGAACA<br>(R) CGGTTTATTTCCAAATCCTAGCTTC | Bao et al. (2018)             |
| <i>AtUbiquitin</i><br>(AT1G02860) | (F) CTGCGACTCAGGGAATCTTCTAA<br>(R) TTGTGCCATTGAATTGAACCC    | Ullah et al. (2018)           |
| <i>VuWRKY21</i>                   | (F) TGTCGGTGGTGTGTGAGAAC<br>(R) CGGACTGGTTTCTTTTCGCC        | Silva-Matos, et al.<br>(2022) |
| <i>VuWRKY87</i>                   | (F) CCACTTCCTGCCGCTGAAT<br>(R) ACTTCGGGGACTACTGCTGA         | Silva-Matos et al.<br>(2022)  |

**Table S2.** Blastn results in the genome of *Arabidopsis thaliana* using primer sequences of *VuWRKY* used in qPCR, performed after the salinity experiment with WT and transgenic lines of *A. thaliana*.

| Gene            | Result    | Access link                                                                                                                                                                                                                                                                       |
|-----------------|-----------|-----------------------------------------------------------------------------------------------------------------------------------------------------------------------------------------------------------------------------------------------------------------------------------|
| <i>VuWRKY21</i> | AT1G75810 | <a href="https://www.ncbi.nlm.nih.gov/tools/primer-blast/primertool.cgi?ctg_time=1648657455&amp;job_key=5uw5B6ISr7qIgD-FMuUbt0j-CoVI7RGYZA">https://www.ncbi.nlm.nih.gov/tools/primer-blast/primertool.cgi?ctg_time=1648657455&amp;job_key=5uw5B6ISr7qIgD-FMuUbt0j-CoVI7RGYZA</a> |
| <i>VuWRKY87</i> | -         | <a href="https://www.ncbi.nlm.nih.gov/tools/primer-blast/primertool.cgi?ctg_time=1648661036&amp;job_key=vbdiXb3HsG-XUbVUuDSRZsIvgFTvPJtJ7g">https://www.ncbi.nlm.nih.gov/tools/primer-blast/primertool.cgi?ctg_time=1648661036&amp;job_key=vbdiXb3HsG-XUbVUuDSRZsIvgFTvPJtJ7g</a> |

**Table S3.** Expression values (FC and related data) of *VuWRKY21* gene expression analysis in *Arabidopsis* transgenic lines and WT, by qPCR. The values from the REST analysis are related to four times after stress imposition (1, 2, 4 and 8 h) compared to control. Abbreviations: REF = Reference gene; TRG = Target.

|    | Gene            | Type    | Reaction Efficiency | Expression | Std. Error     | 95% C.I.        | P(H1) | Result |
|----|-----------------|---------|---------------------|------------|----------------|-----------------|-------|--------|
| WT | <i>VuWRKY21</i> | TRG 1 h | 1                   | 0.001      | 0.000 - 4.944  | 0.000 - 15.671  | 0.077 |        |
| WT | SOS1            | TRG 1 h | 1                   | 1.724      | 0.388 - 9.280  | 0.139 - 26.909  | 0.301 |        |
| WT | SOS2            | TRG 1 h | 1                   | 1.222      | 0.715 - 1.963  | 0.454 - 3.204   | 0.278 |        |
| WT | SOS3            | TRG 1 h | 1                   | 1.422      | 0.503 - 4.298  | 0.232 - 11.314  | 0.364 |        |
| WT | RD29A           | TRG 1 h | 0.98                | 1.754      | 0.194 - 17.928 | 0.050 - 63.870  | 0.435 |        |
| WT | <i>AtNHX1</i>   | TRG 1 h | 1                   | 1.410      | 0.431 - 6.239  | 0.173 - 7.945   | 0.4   |        |
| WT | <i>AtP5CS1</i>  | TRG 1 h | 0.96                | 0.001      | 0.000 - 5.761  | 0.000 - 30.941  | 0.079 |        |
| L1 | <i>VuWRKY21</i> | TRG 1 h | 1                   | 4.849      | 2.359 - 10.047 | 1.693 - 19.698  | 0     | UP     |
| L1 | SOS1            | TRG 1 h | 1                   | 1.397      | 0.931 - 2.158  | 0.683 - 3.387   | 0.03  | UP     |
| L1 | SOS2            | TRG 1 h | 1                   | 0          |                |                 |       |        |
| L1 | SOS3            | TRG 1 h | 1                   | 0          |                |                 |       |        |
| L1 | RD29A           | TRG 1 h | 0.98                | 6.775      | 3.081 - 15.780 | 1.015 - 24.071  | 0     | UP     |
| L1 | <i>AtNHX1</i>   | TRG 1 h | 1                   | 1.408      | 1.015 - 1.794  | 0.818 - 2.219   | 0.003 | UP     |
| L1 | <i>AtP5CS1</i>  | TRG 1 h | 0.96                | 8.008      | 3.980 - 16.196 | 2.371 - 32.028  | 0     | UP     |
| L2 | <i>VuWRKY21</i> | TRG 1 h | 1                   | 0.444      | 0.126 - 1.434  | 0.071 - 3.095   | 0.052 |        |
| L2 | SOS1            | TRG 1 h | 1                   | 0.759      | 0.171 - 2.028  | 0.093 - 3.605   | 0.489 |        |
| L2 | SOS2            | TRG 1 h | 1                   | 0.623      | 0.279 - 1.671  | 0.033 - 2.809   | 0.244 |        |
| L2 | SOS3            | TRG 1 h | 1                   | 0.295      | 0.150 - 0.608  | 0.090 - 0.993   | 0     | DOWN   |
| L2 | RD29A           | TRG 1 h | 0.98                | 6.600      | 1.789 - 33.520 | 0.592 - 61.103  | 0.002 | UP     |
| L2 | <i>AtNHX1</i>   | TRG 1 h | 1                   | 1.394      | 0.501 - 3.602  | 0.191 - 6.320   | 0.331 |        |
| L2 | <i>AtP5CS1</i>  | TRG 1 h | 0.96                | 2.653      | 0.606 - 12.364 | 0.128 - 29.557  | 0.09  |        |
| L3 | <i>VuWRKY21</i> | TRG 1 h | 1                   | 4.514      | 0.414 - 71.306 | 0.176 - 442.643 | 0.166 |        |
| L3 | SOS1            | TRG 1 h | 1                   | 0.78       | 0.257 - 2.259  | 0.093 - 6.453   | 0.51  |        |
| L3 | SOS2            | TRG 1 h | 1                   | 0          |                |                 |       |        |
| L3 | SOS3            | TRG 1 h | 1                   | 0.424      | 0.258 - 0.715  | 0.206 - 1.035   | 0     | DOWN   |
| L3 | RD29A           | TRG 1 h | 0.98                | 0.153      | 0.011 - 1.093  | 0.004 - 2.858   | 0.01  | DOWN   |
| L3 | <i>AtNHX1</i>   | TRG 1 h | 1                   | 0.38       | 0.047 - 1.881  | 0.021 - 2.949   | 0.131 |        |
| L3 | <i>AtP5CS1</i>  | TRG 1 h | 0.96                | 1.244      | 0.287 - 5.899  | 0.076 - 10.832  | 0.653 |        |
| WT | <i>VuWRKY21</i> | TRG 2 h | 1                   | 2.890      | 1.091 - 7.493  | 0.629 - 16.000  | 0.003 | UP     |
| WT | SOS1            | TRG 2 h | 1                   | 0.605      | 0.059 - 5.675  | 0.007 - 19.293  | 0.532 |        |
| WT | SOS2            | TRG 2 h | 1                   | 1.078      | 0.023 - 17.665 | 0.004 - 86.823  | 0.944 |        |
| WT | SOS3            | TRG 2 h | 1                   | 0          |                |                 |       |        |
| WT | RD29A           | TRG 2 h | 0.98                | 0.277      | 0.044 - 1.375  | 0.017 - 4.455   | 0.032 | DOWN   |
| WT | <i>AtNHX1</i>   | TRG 2 h | 1                   | 1.144      | 0.875 - 1.549  | 0.727 - 2.173   | 0.261 |        |
| WT | <i>AtP5CS1</i>  | TRG 2 h | 0.96                | 6.423      | 4.862 - 9.019  | 3.284 - 12.286  | 0     | UP     |
| L1 | <i>VuWRKY21</i> | TRG 2 h | 1                   | 1.136      | 0.259 - 3.461  | 0.182 - 18.896  | 0.773 |        |
| L1 | SOS1            | TRG 2 h | 1                   | 1.839      | 1.247 - 2.549  | 0.818 - 5.098   | 0.001 | UP     |
| L1 | SOS2            | TRG 2 h | 1                   | 1.070      | 0.291 - 4.351  | 0.089 - 8.694   | 0.881 |        |
| L1 | SOS3            | TRG 2 h | 1                   | 1.711      | 0.632 - 4.823  | 0.356 - 13.833  | 0.149 |        |

|    |                 |         |       |             |                |                 |       |      |
|----|-----------------|---------|-------|-------------|----------------|-----------------|-------|------|
| L1 | RD29A           | TRG 2 h | 0.98  | 10.498      | 5.133 - 24.348 | 2.471 - 36.647  | 0     | UP   |
| L1 | <i>AtNHX1</i>   | TRG 2 h | 1     | 1.019       | 0.483 - 2.110  | 0.332 - 4.084   | 0.938 |      |
| L1 | <i>AtP5CS1</i>  | TRG 2 h | 0.96  | 4.500       | 1.635 - 18.457 | 0.998 - 28.821  | 0     | UP   |
| L2 | <i>VuWRKY21</i> | TRG 2 h | 1     | 0.37        | 0.072 - 1.381  | 0.024 - 3.531   | 0.064 |      |
| L2 | SOS1            | TRG 2 h | 1     | 1.566       | 1.079 - 2.311  | 0.774 - 2.789   | 0.004 | UP   |
| L2 | SOS2            | TRG 2 h | 1     | 0.645       | 0.115 - 4.248  | 0.061 - 6.190   | 0.424 |      |
| L2 | SOS3            | TRG 2 h | 1     | 0.427       | 0.189 - 1.049  | 0.113 - 2.282   | 0.015 | DOWN |
| L2 | RD29A           | TRG 2 h | 0.98  | 2.404       | 0.750 - 7.120  | 0.466 - 25.099  | 0.04  | UP   |
| L2 | <i>AtNHX1</i>   | TRG 2 h | 1     | 1.828       | 0.762 - 4.809  | 0.384 - 8.815   | 0.064 |      |
| L2 | <i>AtP5CS1</i>  | TRG 2 h | 0.96  | 10.488      | 2.768 - 37.11  | 1.727 - 109.068 | 0     | UP   |
| L3 | <i>VuWRKY21</i> | TRG 2 h | 1     | 0.616       | 0.009 - 7.442  | 0.005 - 16.111  | 0.675 |      |
| L3 | SOS1            | TRG 2 h | 1     | 1.494       | 0.781 - 3.262  | 0.532 - 6.105   | 0.102 |      |
| L3 | SOS2            | TRG 2 h | 1     | 0.844       | 0.159 - 2.455  | 0.079 - 6.821   | 0.695 |      |
| L3 | SOS3            | TRG 2 h | 1     | 1.293       | 0.410 - 3.217  | 0.165 - 18.507  | 0.56  |      |
| L3 | RD29A           | TRG 2 h | 0.98  | 16.094      | 3.273- 107.26  | 0.480 - 168.350 | 0.001 | UP   |
| L3 | <i>AtNHX1</i>   | TRG 2 h | 1     | 2.487       | 1.171 - 4.954  | 0.790 - 7.727   | 0     | UP   |
| L3 | <i>AtP5CS1</i>  | TRG 2 h | 0.96  | 29.405      | 8.413 - 122.35 | 3.322 - 314.127 | 0     | UP   |
| WT | <i>VuWRKY21</i> | TRG 4 h | 1     | 0.325       | 0.084 - 1.535  | 0.046 - 8.056   | 0.041 | DOWN |
| WT | SOS1            | TRG 4 h | 1     | 5.639       | 0.966 - 44.364 | 0.603 - 176.069 | 0.008 | UP   |
| WT | SOS2            | TRG 4 h | 1     | 0.765       | 0.305 - 1.669  | 0.139 - 3.655   | 0.356 |      |
| WT | SOS3            | TRG 4 h | 1     | 1.372       | 0.434 - 5.823  | 0.321 - 13.454  | 0.466 |      |
| WT | RD29A           | TRG 4 h | 0.98  | 21.415      | 5.456 - 70.215 | 3.631 - 171.819 | 0     | UP   |
| WT | <i>AtNHX1</i>   | TRG 4 h | 1     | 2.346       | 0.996 - 5.169  | 0.693 - 13.177  | 0.01  | UP   |
| WT | <i>AtP5CS1</i>  | TRG 4 h | 0.96  | 7.471       | 1.991 - 29.423 | 0.623 - 160.200 | 0.001 | UP   |
| L1 | <i>VuWRKY21</i> | TRG 4 h | 1     | 0           | 0.000 - 0.003  | 0.000 - 0.087   | 0     | DOWN |
| L1 | SOS1            | TRG 4 h | 1     | 0.801       | 0.323 - 1.913  | 0.119 - 4.028   | 0.496 |      |
| L1 | SOS2            | TRG 4 h | 1     | 0.285       | 0.136 - 0.496  | 0.084 - 1.474   | 0.001 | DOWN |
| L1 | SOS3            | TRG 4 h | 1     | 0.285       | 0.136 - 0.496  | 0.084 - 1.474   | 0.001 | DOWN |
| L1 | RD29A           | TRG 4 h | 0.98  | 13.366      | 0.215-134.901  | 0.064 - 223.883 | 0.021 | UP   |
| L1 | <i>AtNHX1</i>   | TRG 4 h | 1     | 0.22        | 0.014 - 1.852  | 0.005 - 2.621   | 0.091 |      |
| L1 | <i>AtP5CS1</i>  | TRG 4 h | 0.96  | 0.37        | 0.058 - 9.707  | 0.038 - 11.994  | 0.207 |      |
| L2 | <i>VuWRKY21</i> | TRG 4 h | 1     | 1.538       | 0.390 6.800    | 0.040 - 14.320  | 0.427 |      |
| L2 | SOS1            | TRG 4 h | 1     | 0.917       | 0.443 - 1.667  | 0.218 - 3.918   | 0.757 |      |
| L2 | SOS2            | TRG 4 h | 1     | 1.728       | 0.595 - 5.097  | 0.224 - 15.032  | 0.156 |      |
| L2 | SOS3            | TRG 4 h | 1     | 1.728       | 0.595 - 5.097  | 0.224 - 15.032  | 0.156 |      |
| L2 | RD29A           | TRG 4 h | 0.98  | 42.933      | 16.073-109.76  | 8.688 - 249.317 | 0     | UP   |
| L2 | <i>AtNHX1</i>   | TRG 4 h | 0.948 | 0.503 -1.63 | 0.344 - 2.297  | 0.799           |       |      |
| L2 | <i>AtP5CS1</i>  | TRG 4 h | 0.96  | 2.735       | 0.613 - 15.691 | 0.231 - 42.747  | 0.085 |      |
| L3 | <i>VuWRKY21</i> | TRG 4 h | 1     | 0.855       | 0.448 - 1.670  | 0.261 - 2.789   | 0.49  |      |
| L3 | SOS1            | TRG 4 h | 1     | 0.579       | 0.056 - 1.963  | 0.015 - 8.634   | 0.388 |      |
| L3 | SOS2            | TRG 4 h | 1     | 0.27        | 0.201 - 0.395  | 0.090 - 0.457   | 0     | DOWN |
| L3 | SOS3            | TRG 4 h | 1     | 0.27        | 0.201 - 0.395  | 0.090 - 0.457   | 0     | DOWN |
| L3 | RD29A           | TRG 4 h | 0.98  | 2.162       | 1.025 - 4.381  | 0.532 - 6.372   | 0.005 |      |
| L3 | <i>AtNHX1</i>   | TRG 4 h | 1     | 1.601       | 0.782 - 3.496  | 0.470 - 5.063   | 0.066 |      |
| L3 | <i>AtP5CS1</i>  | TRG 4 h | 0.96  | 2.617       | 1.075 - 6.319  | 0.541 - 11.432  | 0.006 | UP   |

|    |                 |         |      |        |                |                |       |      |
|----|-----------------|---------|------|--------|----------------|----------------|-------|------|
| WT | <i>VuWRKY21</i> | TRG 8 h | 1    | 0      |                |                |       |      |
| WT | SOS1            | TRG 8 h | 1    | 2.317  | 1.070 - 4.966  | 0.582 - 9.849  | 0.005 | UP   |
| WT | SOS2            | TRG 8 h | 1    | 2.109  | 1.314 - 3.129  | 0.727 - 3.605  | 0.003 | UP   |
| WT | SOS3            | TRG 8 h | 1    | 0      |                |                |       |      |
| WT | RD29A           | TRG 8 h | 0.98 | 2      | 1.314 - 3.129  | 0.727 - 3.605  | 0.003 | UP   |
| WT | <i>AtNHX1</i>   | TRG 8 h | 1    | 1.104  | 0.641 - 1.922  | 0.337 - 2.532  | 0.606 |      |
| WT | <i>AtP5CS1</i>  | TRG 8 h | 0.96 | 4.015  | 1.726 - 7.977  | 1.347 - 17.882 | 0     | UP   |
| L1 | <i>VuWRKY21</i> | TRG 8 h | 1    | 1      | 0              |                |       |      |
| L1 | SOS1            | TRG 8 h |      | 0.741  | 0.194 - 1.957  | 0.131 - 2.751  | 0.398 |      |
| L1 | SOS2            | TRG 8 h |      | 2.336  | 1.430 - 3.918  | 0.812 - 5.696  | 0.001 | UP   |
| L1 | SOS3            | TRG 8 h | 1    | 0      |                |                |       |      |
| L1 | RD29A           | TRG 8 h |      | 0.909  | 0.168 - 5.826  | 0.059 - 16.486 | 0.864 |      |
| L1 | <i>AtNHX1</i>   | TRG 8 h | 1    | 0.561  | 0.137 - 1.682  | 0.100 - 3.204  | 0.151 |      |
| L1 | <i>AtP5CS1</i>  | TRG 8 h | 0.96 | 0      |                |                |       |      |
| L2 | <i>VuWRKY21</i> | TRG 8 h | 1    | 2.048  | 1.139 - 3.605  | 0.818 - 5.856  | 0.002 | UP   |
| L2 | SOS1            | TRG 8 h | 1    | 1.245  | 0.495 - 3.297  | 0.354 - 5.736  | 0.484 |      |
| L2 | SOS2            | TRG 8 h | 1    | 2.303  | 0.914 - 7.317  | 0.540 - 11.004 | 0.022 | UP   |
| L2 | SOS3            | TRG 8 h | 1    | 0.647  | 0.463 - 0.871  | 0.355 - 1.137  | 0     | DOWN |
| L2 | RD29A           | TRG 8 h | 0.98 | 17.579 | 8.264 - 34.262 | 4.515 - 44.457 | 0     | UP   |
| L2 | <i>AtNHX1</i>   | TRG 8 h | 1    | 1.697  | 1.229 - 2.362  | 1.050 - 3.272  | 0     | UP   |
| L2 | <i>AtP5CS1</i>  | TRG 8 h | 0.96 | 5.432  | 2.929 - 10.007 | 1.685 - 18.035 | 0     | UP   |
| L3 | <i>VuWRKY21</i> | TRG 8 h | 1    | 0.94   | 0.447 - 1.486  | 0.354 - 2.949  | 0.794 |      |
| L3 | SOS1            | TRG 8 h | 1    | 1.289  | 0.851 - 2.018  | 0.655 - 3.053  | 0.119 |      |
| L3 | SOS2            | TRG 8 h | 1    | 0      |                |                |       |      |
| L3 | SOS3            | TRG 8 h | 1    | 0      |                |                |       |      |
| L3 | RD29A           | TRG 8 h | 0.98 | 9.874  | 0.784 - 44.370 | 0.468 - 55.185 | 0.008 |      |
| L3 | <i>AtNHX1</i>   | TRG 8 h | 1    | 1.447  | 1.064 - 1.963  | 0.717 - 2.313  | 0.005 | UP   |
| L3 | <i>AtP5CS1</i>  | TRG 8 h | 0.96 | 9.925  | 3.183 - 29.350 | 1.270 - 97.576 | 0.001 | UP   |
| WT | Ubiquitin       | REF 1 H | 1    | 1      |                |                |       |      |
| L1 | Ubiquitin       | REF 1 H | 1    | 1      |                |                |       |      |
| L2 | Ubiquitin       | REF 1 H | 1    | 1      |                |                |       |      |
| L3 | Ubiquitin       | REF 1 H | 1    | 1      |                |                |       |      |
| WT | Ubiquitin       | REF 2 H | 1    | 1      |                |                |       |      |
| L1 | Ubiquitin       | REF 2 H | 1    | 1      |                |                |       |      |
| L2 | Ubiquitin       | REF 2 H | 1    | 1      |                |                |       |      |
| L3 | Ubiquitin       | REF 2 H | 1    | 1      |                |                |       |      |
| WT | Ubiquitin       | REF 4 H | 1    | 1      |                |                |       |      |
| L1 | Ubiquitin       | REF 4 H | 1    | 1      |                |                |       |      |
| L2 | Ubiquitin       | REF 4 H | 1    | 1      |                |                |       |      |
| L3 | Ubiquitin       | REF 4 H | 1    | 1      |                |                |       |      |
| WT | Ubiquitin       | REF 8 H | 1    | 1      |                |                |       |      |
| L1 | Ubiquitin       | REF 8 H | 1    | 1      |                |                |       |      |
| L2 | Ubiquitin       | REF 8 H | 1    | 1      |                |                |       |      |
| L3 | Ubiquitin       | REF 8 H | 1    | 1      |                |                |       |      |

**Table S4.** Expression values (FC and related data) of *VuWRKY87* gene expression analysis in *Arabidopsis* transgenic lines and WT, by qPCR technique. The values from the REST analysis are related to four times after stress imposition (1, 2, 4 and 8 h) compared to control. Abbreviations: REF = Reference gene; TRG = Target.

|    | Gene            | Type    | Reaction Efficiency | Expression | Std. Error      | 95% C.I.        | P(H1) | Result |
|----|-----------------|---------|---------------------|------------|-----------------|-----------------|-------|--------|
| WT | <i>VuWRKY87</i> | TRG 1 h | 1                   | 0          |                 |                 |       |        |
| WT | SOS1            | TRG 1 h | 0.62                | 1.815      | 0.100 - 48.803  | 0.069 - 69.425  | 0.542 |        |
| WT | SOS2            | TRG 1 h | 0.62                | 1.926      | 0.082 - 99.981  | 0.034 - 110.852 | 0.557 |        |
| WT | SOS3            | TRG 1 h | 0.59                | 2.426      | 0.094 - 127.433 | 0.036 - 211.815 | 0     |        |
| WT | RD29A           | TRG 1 h | 0.6                 | 0.201      | 0.026 - 7.229   | 0.018 - 9.948   | 0.092 |        |
| WT | <i>AtNHX1</i>   | TRG 1 h | 0.62                | 2.072      | 1.451 - 2.773   | 1.028 - 3.780   | 0     | UP     |
| WT | <i>AtP5CS1</i>  | TRG 1 h | 0.59                | 1.478      | 1.094 - 2.048   | 0.850 - 3.080   | 0.002 | UP     |
| L1 | <i>VuWRKY87</i> | TRG 1 h | 1                   | 0          |                 |                 |       |        |
| L1 | SOS1            | TRG 1 h | 0.62                | 1.615      | 0.088 - 42.357  | 0.057 - 67.928  | 0.628 |        |
| L1 | SOS2            | TRG 1 h | 0.62                | 1.556      | 0.060 - 74.752  | 0.024 - 108.923 | 0.682 |        |
| L1 | SOS3            | TRG 1 h | 0.59                | 1.533      | 0.059 - 75.140  | 0.020 - 220.186 | 0.708 |        |
| L1 | RD29A           | TRG 1 h | 0.6                 | 0.16       | 0.021 - 6.446   | 0.014 - 8.039   | 0.057 |        |
| L1 | <i>AtNHX1</i>   | TRG 1 h | 0.62                | 1.998      | 1.463 - 2.876   | 1.083 - 3.294   | 0     | UP     |
| L1 | <i>AtP5CS1</i>  | TRG 1 h | 0.59                | 0.99       | 0.646 - 1.604   | 0.492 - 2.007   | 0.957 |        |
| L2 | <i>VuWRKY87</i> | TRG 1 h | 1                   | 0          | 0.213 - 0.782   | 0.144 - 1.093   | 0.005 | DOWN   |
| L2 | SOS1            | TRG 1 h | 0.62                | 4.431      | 0.190 - 26.675  | 0.118 - 38.203  | 0.076 |        |
| L2 | SOS2            | TRG 1 h | 0.62                | 10.121     | 0.285 - 88.497  | 0.110 - 122.222 | 0.018 | UP     |
| L2 | SOS3            | TRG 1 h | 0.59                | 7.489      | 0.224 - 56.373  | 0.131 - 104.397 | 0.034 | UP     |
| L2 | RD29A           | TRG 1 h | 0.6                 | 2.327      | 1.405 - 4.019   | 1.084 - 6.323   | 0     | UP     |
| L2 | <i>AtNHX1</i>   | TRG 1 h | 0.62                | 1.536      | 0.872 - 2.521   | 0.424 - 2.991   | 0.05  | UP     |
| L2 | <i>AtP5CS1</i>  | TRG 1 h | 0.59                | 2.028      | 1.175 - 3.311   | 0.817 - 5.096   | 0.001 | UP     |
| L3 | <i>VuWRKY87</i> | TRG 1 h | 1                   | 0          |                 |                 |       |        |
| L3 | SOS1            | TRG 1 h | 0.62                | 0.691      | 0.489 - 0.970   | 0.339 - 1.087   | 0.003 | DOWN   |
| L3 | SOS2            | TRG 1 h | 0.62                | 0.83       | 0.643 - 1.045   | 0.534 - 1.454   | 0.069 |        |
| L3 | SOS3            | TRG 1 h | 0.59                | 0.933      | 0.517 - 1.932   | 0.203 - 3.816   | 0.782 |        |
| L3 | RD29A           | TRG 1 h | 0.6                 | 0.832      | 0.442 - 1.608   | 0.227 - 2.293   | 0.417 |        |
| L3 | <i>AtNHX1</i>   | TRG 1 h | 0.62                | 1.025      | 0.640 - 1.523   | 0.540 - 2.041   | 0.87  |        |
| L3 | <i>AtP5CS1</i>  | TRG 1 h | 0.59                | 1.573      | 1.117 - 2.268   | 0.890 - 2.990   | 0.001 | UP     |
| WT | <i>VuWRKY87</i> | TRG 2 h | 1                   | 0          |                 |                 |       |        |
| WT | SOS1            | TRG 2 h | 1                   | 0.342      | 0.222 - 0.506   | 0.158 - 0.843   | 0.002 | DOWN   |
| WT | SOS2            | TRG 2 h | 1                   | 0.465      | 0.282 - 0.771   | 0.218 - 1.347   | 0.009 | DOWN   |
| WT | SOS3            | TRG 2 h | 0.93                | 0.269      | 0.140 - 0.580   | 0.083 - 0.760   | 0.001 | DOWN   |
| WT | RD29A           | TRG 2 h | 0.98                | 0.559      | 0.420 - 0.863   | 0.357 - 1.145   | 0.007 | DOWN   |
| WT | <i>AtNHX1</i>   | TRG 2 h | 1                   | 0.533      | 0.371 - 0.689   | 0.306 - 1.074   | 0.005 | DOWN   |
| WT | <i>AtP5CS1</i>  | TRG 2 h | 0.96                | 0.578      | 0.287 - 1.092   | 0.201 - 1.370   | 0.083 |        |
| L1 | <i>VuWRKY87</i> | TRG 2 h | 1                   | 0          |                 |                 |       |        |
| L1 | SOS1            | TRG 2 h | 0.62                | 0.535      | 0.405 - 0.701   | 0.314 - 0.895   | 0     | DOWN   |
| L1 | SOS2            | TRG 2 h | 0.62                | 0.559      | 0.403 - 0.788   | 0.320 - 1.064   | 0     | DOWN   |
| L1 | SOS3            | TRG 2 h | 0.59                | 0.315      | 0.229 - 0.470   | 0.174 - 0.528   | 0     | DOWN   |

|    |                 |         |      |       |               |                |       |      |
|----|-----------------|---------|------|-------|---------------|----------------|-------|------|
| L1 | RD29A           | TRG 2 h | 0.6  | 0.725 | 0.400 - 1.142 | 0.339 - 1.770  | 0.063 |      |
| L1 | <i>AtNHX1</i>   | TRG 2 h | 0.62 | 0.601 | 0.492 - 0.763 | 0.399 - 0.895  | 0     | DOWN |
| L1 | <i>AtP5CS1</i>  | TRG 2 h | 0.59 | 0.863 | 0.520 - 1.363 | 0.334 - 1.806  | 0.365 |      |
| L2 | <i>VuWRKY87</i> | TRG 2 h | 1    | 0.84  | 0.617 - 1.116 | 0.527 - 1.388  | 0.18  |      |
| L2 | SOS1            | TRG 2 h | 0.62 | 1.213 | 0.758 - 2.043 | 0.617 - 2.183  | 0.168 |      |
| L2 | SOS2            | TRG 2 h | 0.62 | 0.943 | 0.576 - 1.518 | 0.376 - 2.712  | 0.741 |      |
| L2 | SOS3            | TRG 2 h | 0.59 | 0.649 | 0.245 - 1.491 | 0.152 - 3.564  | 0.184 |      |
| L2 | RD29A           | TRG 2 h | 0.6  | 1.262 | 0.654 - 2.658 | 0.482 - 3.811  | 0.319 |      |
| L2 | <i>AtNHX1</i>   | TRG 2 h | 0.62 | 1.126 | 0.807 - 1.487 | 0.677 - 1.747  | 0.227 |      |
| L2 | <i>AtP5CS1</i>  | TRG 2 h | 0.59 | 1.723 | 0.781 - 2.964 | 0.674 - 5.823  | 0.023 | UP   |
| L3 | <i>VuWRKY87</i> | TRG 2 h | 1    | 0.608 | 0.284 - 1.291 | 0.205 - 2.454  | 0.145 |      |
| L3 | SOS1            | TRG 2 h | 1    | 1.142 | 1.015 - 1.386 | 0.732 - 1.610  | 0.069 |      |
| L3 | SOS2            | TRG 2 h | 0.62 | 1.025 | 0.711 - 1.509 | 0.579 - 1.985  | 0.848 |      |
| L3 | SOS3            | TRG 2 h | 0.59 | 0.638 | 0.375 - 1.282 | 0.245 - 1.773  | 0.039 | DOWN |
| L3 | RD29A           | TRG 2 h | 0.6  | 2.289 | 1.303 - 4.023 | 1.029 - 5.864  | 0     | UP   |
| L3 | <i>AtNHX1</i>   | TRG 2 h | 0.62 | 1.148 | 0.834 - 1.546 | 0.693 - 2.108  | 0.211 |      |
| L3 | <i>AtP5CS1</i>  | TRG 2 h | 0.59 | 1.216 | 0.961 - 1.884 | 0.244 - 2.454  | 0.388 |      |
| WT | <i>VuWRKY87</i> | TRG 4 h | 1    | 0     |               |                |       |      |
| WT | SOS1            | TRG 4 h | 0.62 | 0.914 | 0.642 - 1.370 | 0.519 - 1.873  | 0.487 |      |
| WT | SOS2            | TRG 4 h | 0.62 | 0.681 | 0.561 - 0.811 | 0.429 - 0.913  | 0     | DOWN |
| WT | SOS3            | TRG 4 h | 0.59 | 0.481 | 0.311 - 0.781 | 0.252 - 0.990  | 0     | DOWN |
| WT | RD29A           | TRG 4 h | 0.6  | 2.665 | 1.513 - 4.150 | 1.119 - 5.492  | 0     | UP   |
| WT | <i>AtNHX1</i>   | TRG 4 h | 0.62 | 0.812 | 0.630 - 1.052 | 0.458 - 1.256  | 0.039 | DOWN |
| WT | <i>AtP5CS1</i>  | TRG 4 h | 0.59 | 1.918 | 1.567 - 2.872 | 0.538 - 3.796  | 0.001 | UP   |
| L1 | <i>VuWRKY87</i> | TRG 4 h | 1    | 0     |               |                |       |      |
| L1 | SOS1            | TRG 4 h | 0.62 | 0.577 | 0.337 - 0.965 | 0.265 - 1.392  | 0.012 | DOWN |
| L1 | SOS2            | TRG 4 h | 0.62 | 0.619 | 0.368 - 0.971 | 0.279 - 1.285  | 0.009 | DOWN |
| L1 | SOS3            | TRG 4 h | 0.59 | 0.372 | 0.226 - 0.586 | 0.158 - 0.857  | 0.001 | DOWN |
| L1 | RD29A           | TRG 4 h | 0.6  | 2.363 | 1.733 - 3.275 | 1.436 - 4.021  | 0     | UP   |
| L1 | <i>AtNHX1</i>   | TRG 4 h | 0.62 | 0.74  | 0.482 - 1.070 | 0.436 - 2.008  | 0.047 | DOWN |
| L1 | <i>AtP5CS1</i>  | TRG 4 h | 0.59 | 1.660 | 1.172 - 2.370 | 0.919 - 3.553  | 0     | UP   |
| L2 | <i>VuWRKY87</i> | TRG 4 h | 1    | 1.382 | 1.133 - 1.656 | 1.109 - 1.787  | 0     | UP   |
| L2 | SOS1            | TRG 4 h | 0.62 | 0.763 | 0.523 - 1.127 | 0.407 - 1.815  | 0.074 |      |
| L2 | SOS2            | TRG 4 h | 0.62 | 0.322 | 0.196 - 0.585 | 0.151 - 1.022  | 0     | DOWN |
| L2 | SOS3            | TRG 4 h | 0.59 | 0.456 | 0.278 - 0.652 | 0.203 - 1.254  | 0.001 | DOWN |
| L2 | RD29A           | TRG 4 h | 0.6  | 1.948 | 1.057 - 3.549 | 0.369 - 9.112  | 0.026 | UP   |
| L2 | <i>AtNHX1</i>   | TRG 4 h | 0.62 | 0.706 | 0.480 - 1.099 | 0.393 - 1.448  | 0.021 | DOWN |
| L2 | <i>AtP5CS1</i>  | TRG 4 h | 0.59 | 1.868 | 1.241 - 3.294 | 0.943 - 5.513  | 0     | UP   |
| L3 | <i>VuWRKY87</i> | TRG 4 h | 1    | 0.89  | 0.361 - 1.984 | 0.238 - 2.551  | 0.711 |      |
| L3 | SOS1            | TRG 4 h | 1    | 0.815 | 0.448 - 1.310 | 0.363 - 1.744  | 0.252 |      |
| L3 | SOS2            | TRG 4 h | 0.62 | 0.779 | 0.532 - 1.224 | 0.364 - 1.587  | 0.096 |      |
| L3 | SOS3            | TRG 4 h | 0.59 | 0.464 | 0.210 - 1.089 | 0.059 - 1.925  | 0.027 | DOWN |
| L3 | RD29A           | TRG 4 h | 0.6  | 4.215 | 1.565 - 9.214 | 1.148 - 16.808 | 0     | UP   |
| L3 | <i>AtNHX1</i>   | TRG 4 h | 0.62 | 0.832 | 0.495 - 1.374 | 0.305 - 1.765  | 0.322 |      |
| L3 | <i>AtP5CS1</i>  | TRG 4 h | 0.59 | 1.909 | 1.120 - 3.466 | 0.876 - 5.853  | 0.004 | UP   |

|    |                 |         |      |       |               |                |       |      |
|----|-----------------|---------|------|-------|---------------|----------------|-------|------|
| WT | <i>VuWRKY87</i> | TRG 8 h | 1    | 0     |               |                |       |      |
| WT | SOS1            | TRG 8 h | 0.62 | 1.472 | 1.020 - 2.041 | 0.653 - 3.059  | 0.008 | UP   |
| WT | SOS2            | TRG 8 h | 0.62 | 1.609 | 1.188 - 2.165 | 1.039 - 3.250  | 0     | UP   |
| WT | SOS3            | TRG 8 h | 0.59 | 0.965 | 0.631 - 1.594 | 0.519 - 2.130  | 0.809 |      |
| WT | RD29A           | TRG 8 h | 0.6  | 3.120 | 1.599 - 6.732 | 0.833 - 8.275  | 0     | UP   |
| WT | <i>AtNHX1</i>   | TRG 8 h | 0.62 | 0.899 | 0.935 - 1.416 | 0.088 - 1.748  | 0.992 |      |
| WT | <i>AtP5CS1</i>  | TRG 8 h | 0.59 | 1.328 | 1.012 - 1.825 | 0.658 - 2.452  | 0.022 | UP   |
| L1 | <i>VuWRKY87</i> | TRG 8 h | 1    | 1.096 | 0.865 - 1.433 | 0.784 - 1.561  | 0.399 |      |
| L1 | SOS1            | TRG 8 h | 0.62 | 0.89  | 0.537 - 1.513 | 0.391 - 2.011  | 0.473 |      |
| L1 | SOS2            | TRG 8 h | 0.62 | 1.039 | 0.665 - 1.880 | 0.432 - 3.397  | 0.839 |      |
| L1 | SOS3            | TRG 8 h | 0.59 | 0.491 | 0.253 - 1.030 | 0.181 - 1.632  | 0.008 | DOWN |
| L1 | RD29A           | TRG 8 h | 0.6  | 3.983 | 1.427 - 8.810 | 0.942 - 14.061 | 0.001 | UP   |
| L1 | <i>AtNHX1</i>   | TRG 8 h | 0.62 | 0.38  | 0.032 - 1.946 | 0.014 - 3.029  | 0.172 |      |
| L1 | <i>AtP5CS1</i>  | TRG 8 h | 0.59 | 2.971 | 1.900 - 4.641 | 1.214 - 6.359  | 0     | UP   |
| L2 | <i>VuWRKY87</i> | TRG 8 h | 1    | 0     |               |                |       |      |
| L2 | SOS1            | TRG 8 h | 0.62 | 1.016 | 0.763 - 1.327 | 0.688 - 1.574  | 0.853 |      |
| L2 | SOS2            | TRG 8 h | 0.62 | 0.926 | 0.812 - 1.277 | 0.233 - 1.731  | 0.839 |      |
| L2 | SOS3            | TRG 8 h | 0.59 | 0.533 | 0.266 - 1.174 | 0.218 - 1.557  | 0.011 | DOWN |
| L2 | RD29A           | TRG 8 h | 0.6  | 0.79  | 0.376 - 1.371 | 0.281 - 1.959  | 0.253 |      |
| L2 | <i>AtNHX1</i>   | TRG 8 h | 0.62 | 0.756 | 0.631 - 0.899 | 0.576 - 1.009  | 0     | DOWN |
| L2 | <i>AtP5CS1</i>  | TRG 8 h | 0.59 | 2.844 | 1.719 - 4.504 | 1.349 - 6.620  | 0     | UP   |
| L3 | <i>VuWRKY87</i> | TRG 8 h | 1    | 0     |               |                |       |      |
| L3 | SOS1            | TRG 8 h | 0.62 | 1     | 0.533 - 0.961 | 0.409 - 1.074  | 0.004 | DOWN |
| L3 | SOS2            | TRG 8 h | 0.62 | 0.483 | 0.401 - 0.914 | 0.031 - 1.138  | 0.001 | DOWN |
| L3 | SOS3            | TRG 8 h | 0.59 | 0.647 | 0.462 - 0.874 | 0.355 - 1.063  | 0.001 | DOWN |
| L3 | RD29A           | TRG 8 h | 0.6  | 3.598 | 1.186 - 9.015 | 0.913 - 11.265 | 0     | UP   |
| L3 | <i>AtNHX1</i>   | TRG 8 h | 0.62 | 0.868 | 0.761 - 1.101 | 0.383 - 1.239  | 0.212 |      |
| L3 | <i>AtP5CS1</i>  | TRG 8 h | 0.59 | 1.532 | 1.003 - 2.153 | 0.790 - 3.131  | 0.007 | UP   |
| WT | Ubiquitin       | REF 1 H | 1    | 1     |               |                |       |      |
| L1 | Ubiquitin       | REF 1 H | 1    | 1     |               |                |       |      |
| L2 | Ubiquitin       | REF 1 H | 1    | 1     |               |                |       |      |
| L3 | Ubiquitin       | REF 1 H | 1    | 1     |               |                |       |      |
| WT | Ubiquitin       | REF 2 H | 1    | 1     |               |                |       |      |
| L1 | Ubiquitin       | REF 2 H | 1    | 1     |               |                |       |      |
| L2 | Ubiquitin       | REF 2 H | 1    | 1     |               |                |       |      |
| L3 | Ubiquitin       | REF 2 H | 1    | 1     |               |                |       |      |
| WT | Ubiquitin       | REF 4 H | 1    | 1     |               |                |       |      |
| L1 | Ubiquitin       | REF 4 H | 1    | 1     |               |                |       |      |
| L2 | Ubiquitin       | REF 4 H | 1    | 1     |               |                |       |      |
| L3 | Ubiquitin       | REF 4 H | 1    | 1     |               |                |       |      |
| WT | Ubiquitin       | REF 8 H | 1    | 1     |               |                |       |      |
| L1 | Ubiquitin       | REF 8 H | 1    | 1     |               |                |       |      |
| L2 | Ubiquitin       | REF 8 H | 1    | 1     |               |                |       |      |
| L3 | Ubiquitin       | REF 8 H | 1    | 1     |               |                |       |      |

**Table S5.** Subcellular location, molecular weight (kDA) and isoelectric point of proteins VuWRKY21 and VuWRKY87.

| ID      | Subcellular location | Number of amino acids (aa) | Isoelectric point | Molecular weight (WM) | Signal peptide |
|---------|----------------------|----------------------------|-------------------|-----------------------|----------------|
| WRKY 21 | Nucleus              | 317                        | 8.23              | 35.36                 | 0.0005         |
| WRKY 87 | Nucleus              | 353                        | 5.67              | 39.36                 | 0.0007         |



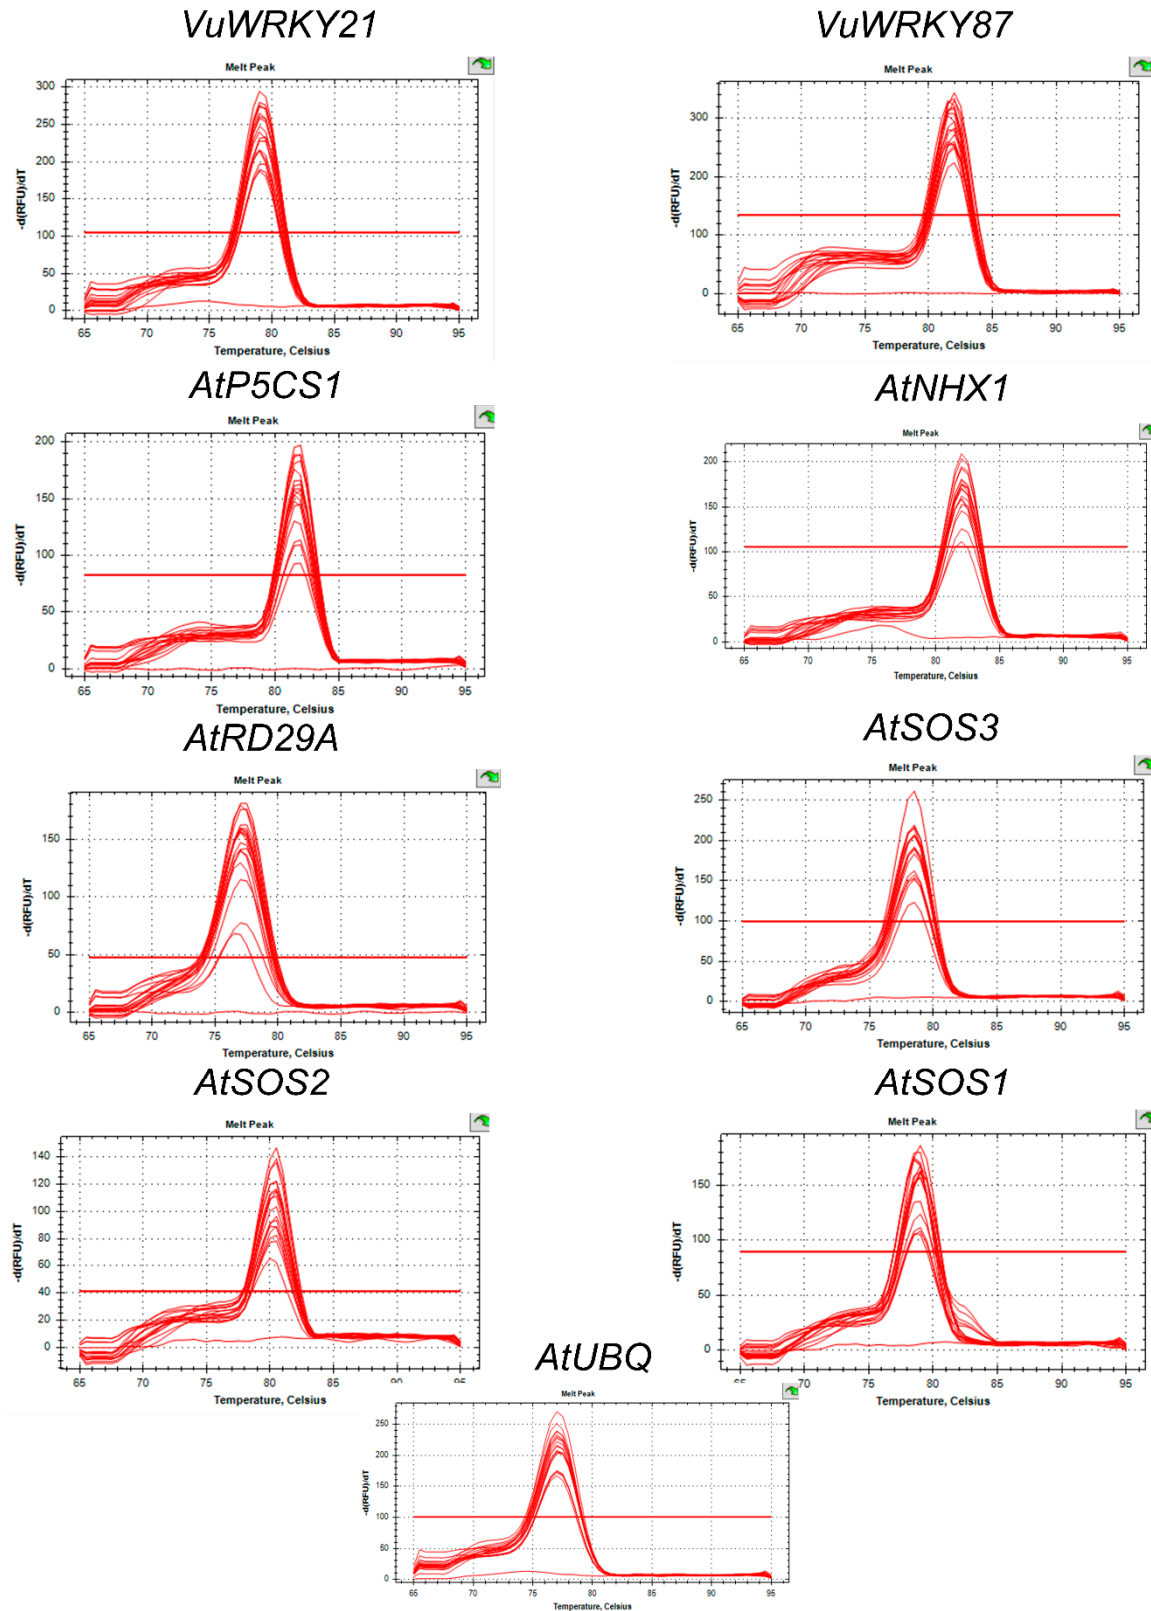

**Figure S1.** Melting curve of primers for all genes used in the *VuWRKY21* and 87 expression analysis in *Arabidopsis* transgenic lines and WT, via qPCR.

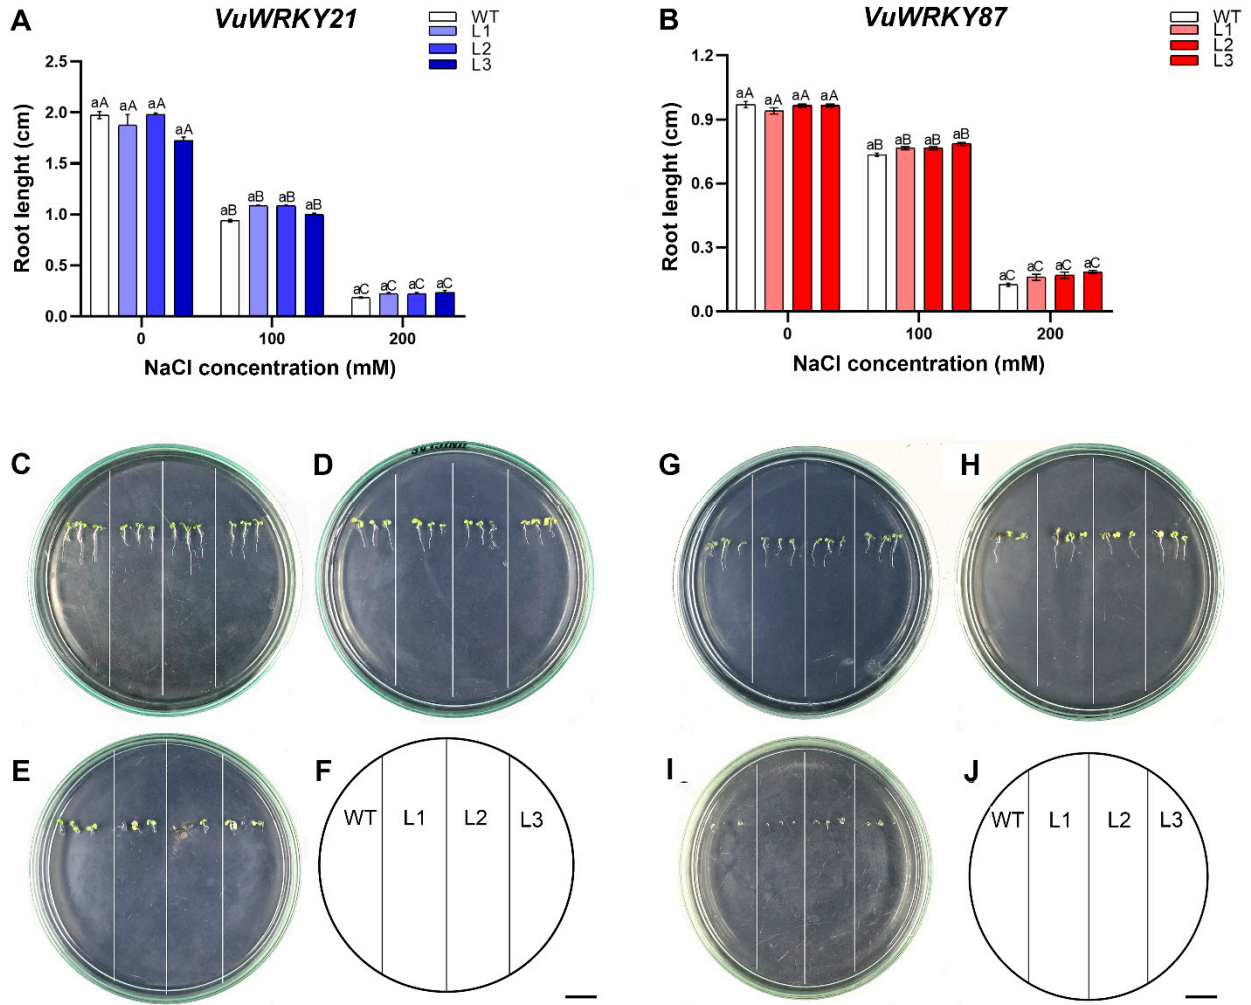

**Figure S2.** Average of root length of *Arabidopsis* transgenic lines carrying *VuWRKY21* (A) and *VuWRKY87* (B) genes (L1, L2, L3) and wild type (WT) plants under varying NaCl concentrations: 0 mM, 100 mM, and 200 mM. This test was performed with three biological replicates, each comprising 20 seeds. (C-J) Root length of *A. thaliana* seedlings carrying the *VuWRKY21* (C-E) and *VuWRKY87* (G-I) genes (L1, L2, L3) and the WT, germinated under different NaCl concentrations: 0 mM (C, G); 100 mM (D, H); and 200 mM (E, I), after seven days cultivation. Identical letters indicate no statistical difference among the observed time points (A and B). Blue bars (A) correspond to results for *VuWRKY21* transgenic lines, and red bars (B) represent *VuWRKY87* transgenic lines.
